# Supplementary material for: Pathological molecular mechanism of symptomatic late-onset Fuchs endothelial corneal dystrophy by bioinformatic analysis
Source: PubMed Central journal article supplement (PMC5963778; doi:10.1371/journal.pone.0197750), 2018-05-22

# Figure S1

**A**

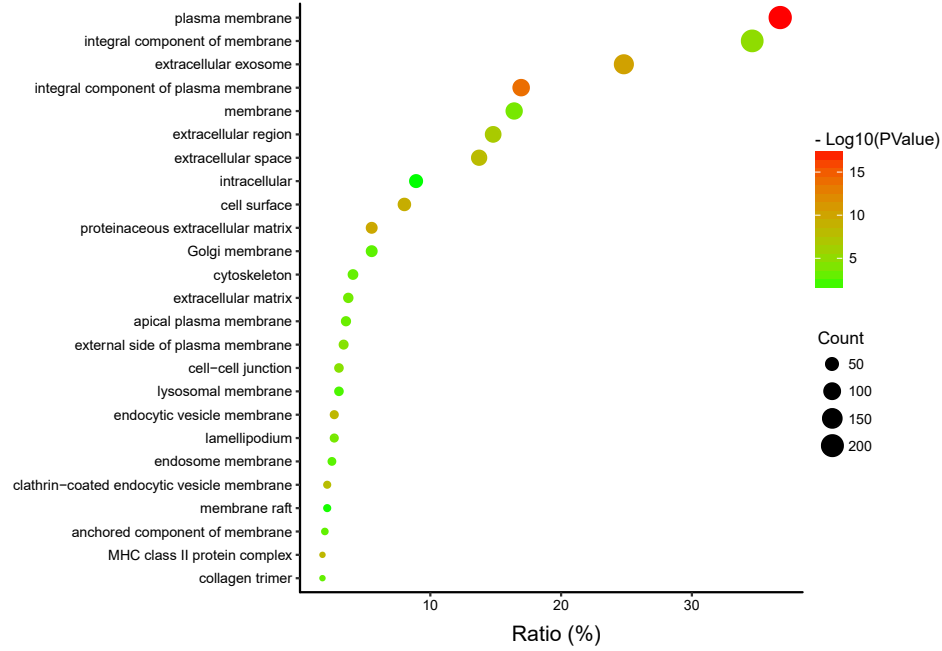

**B**

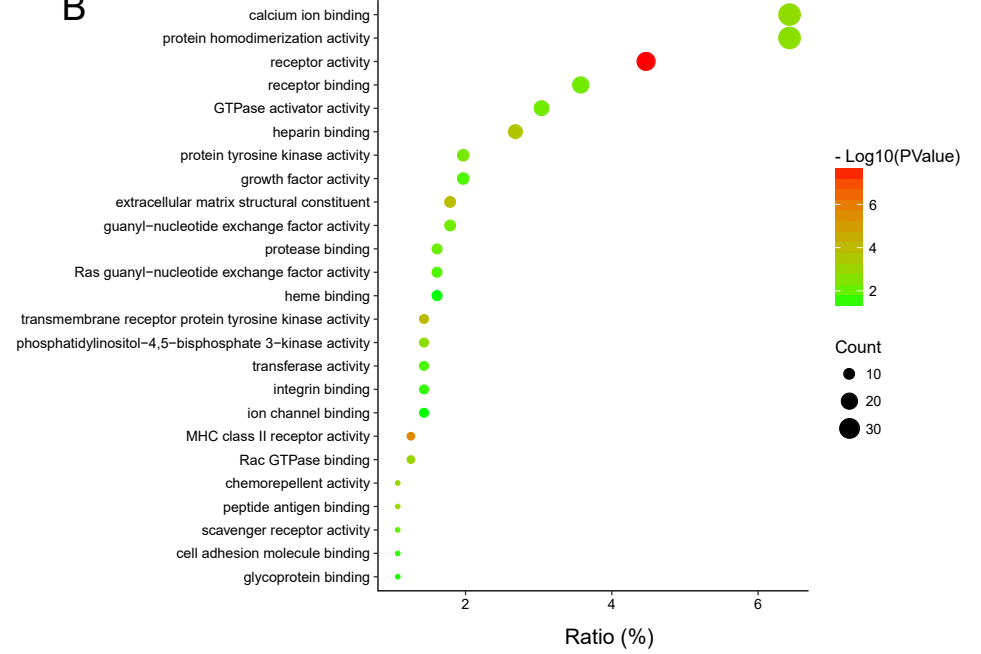

**C**

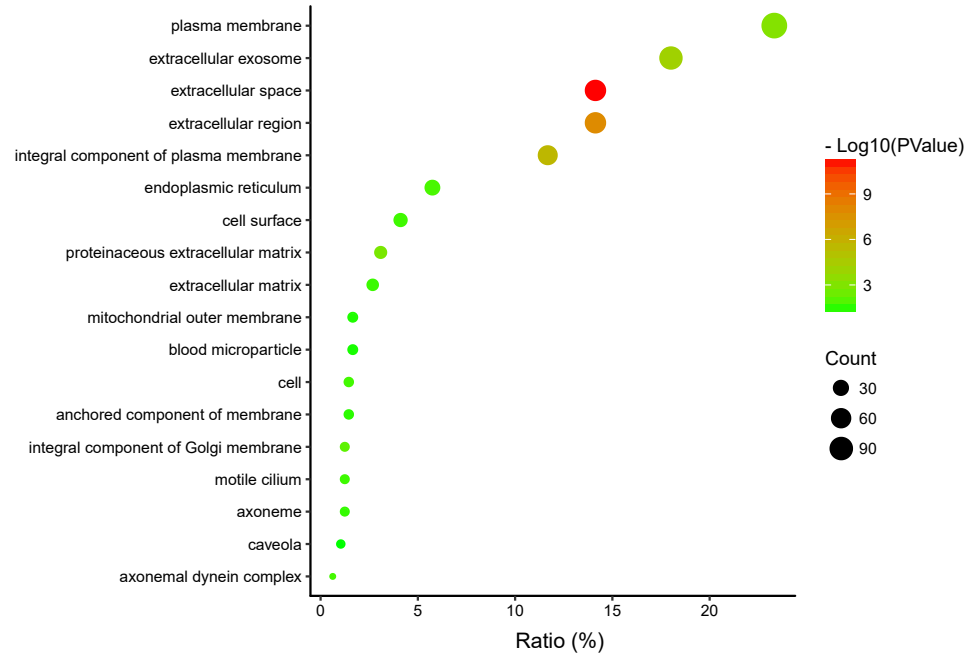

**D**

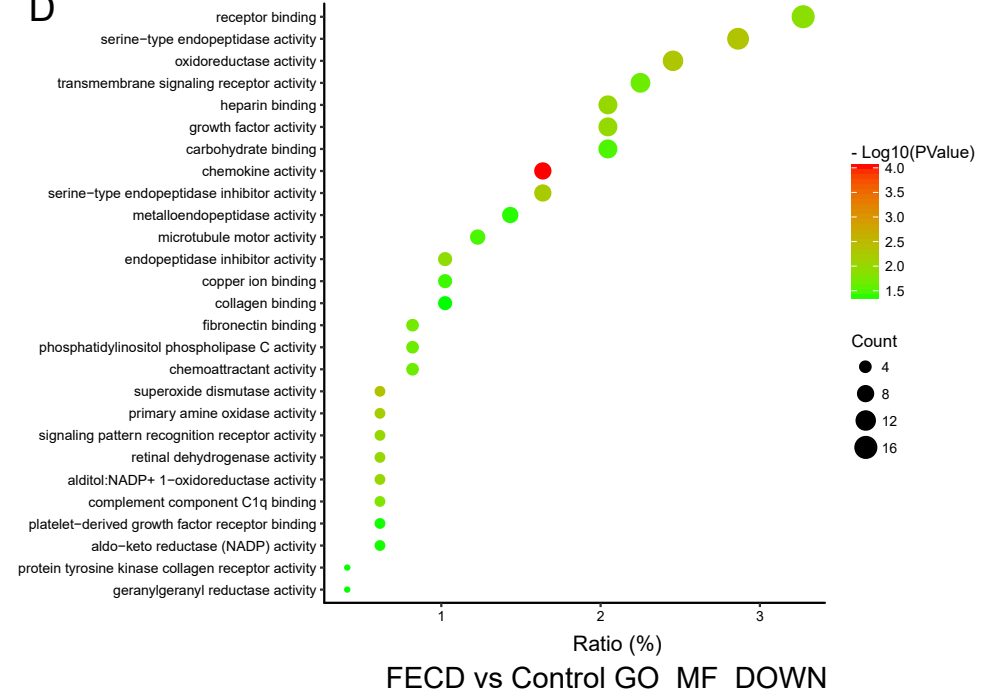

Supplement: pone.0197750.s001.pdf [file pone.0197750.s001.pdf]
